# Supplementary material
Source: PubMed Central journal article supplement (PMC1599897)

**A**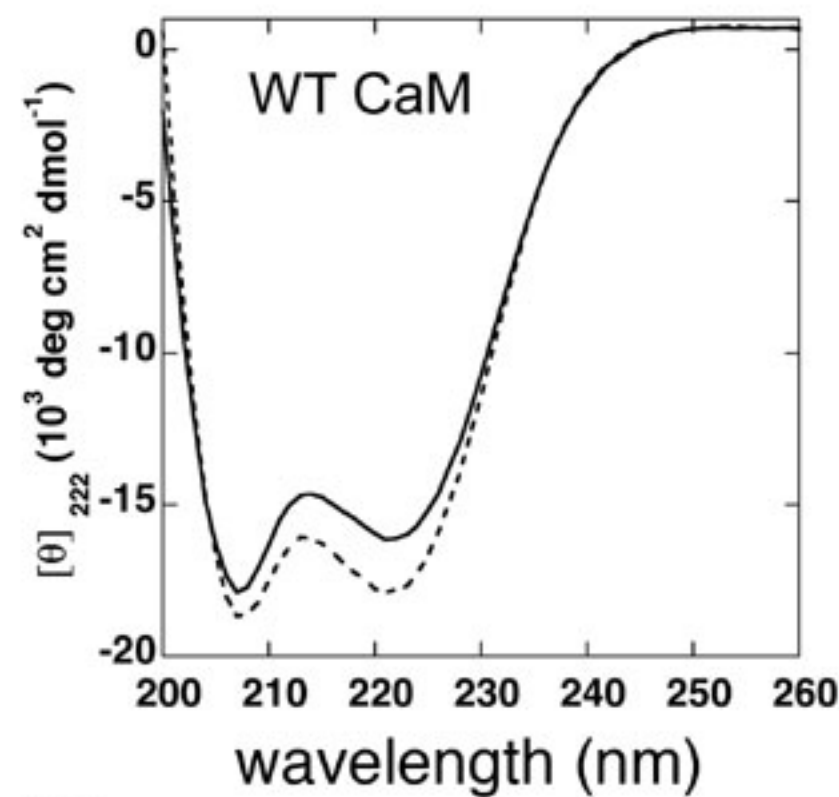**B**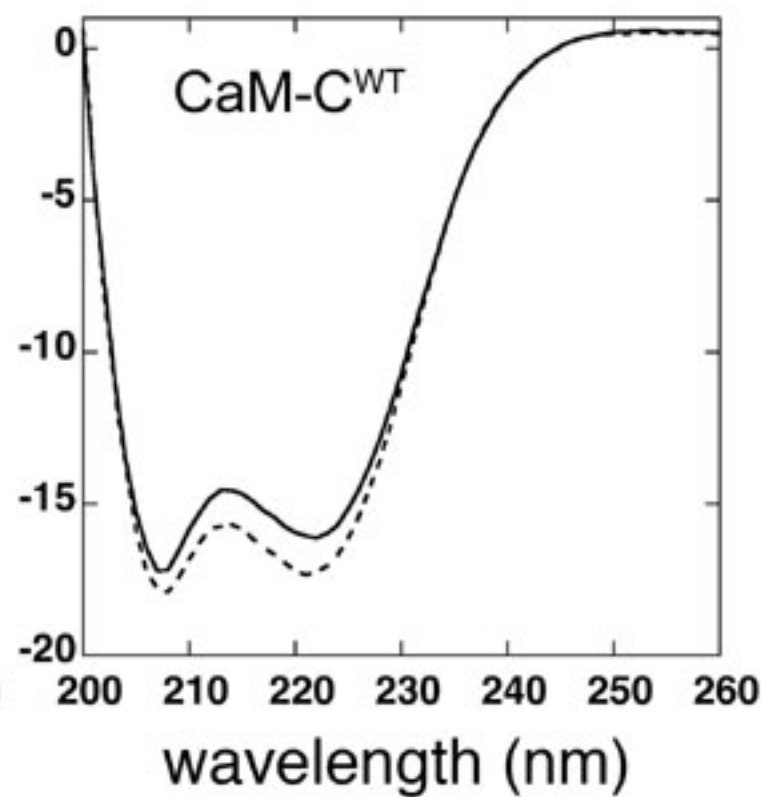**C**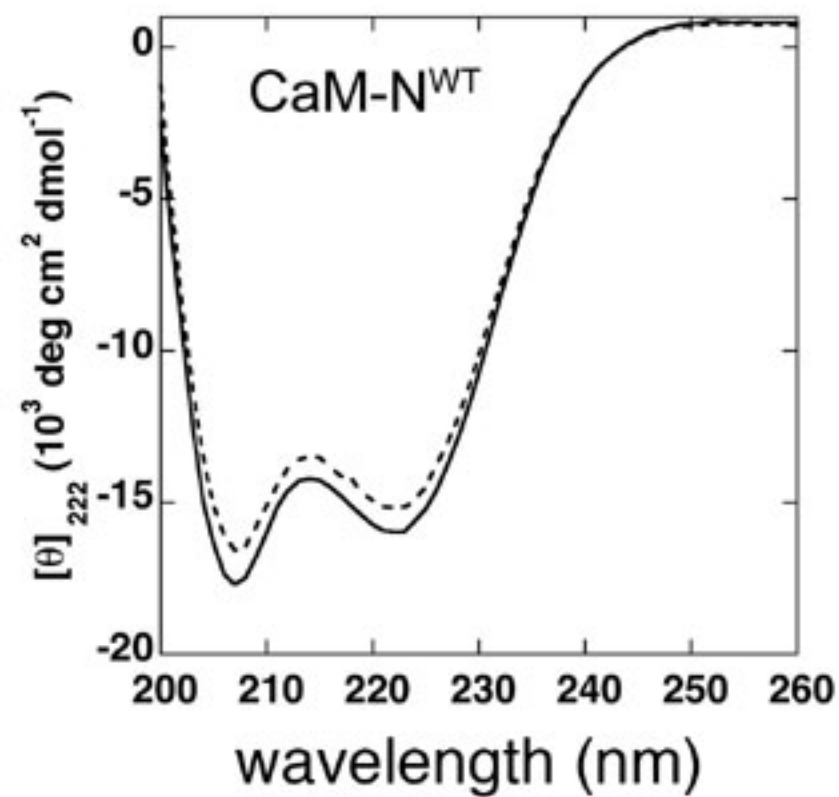

Supplement: pnas_0606433103_1.pdf [file pnas_0606433103_1.pdf]

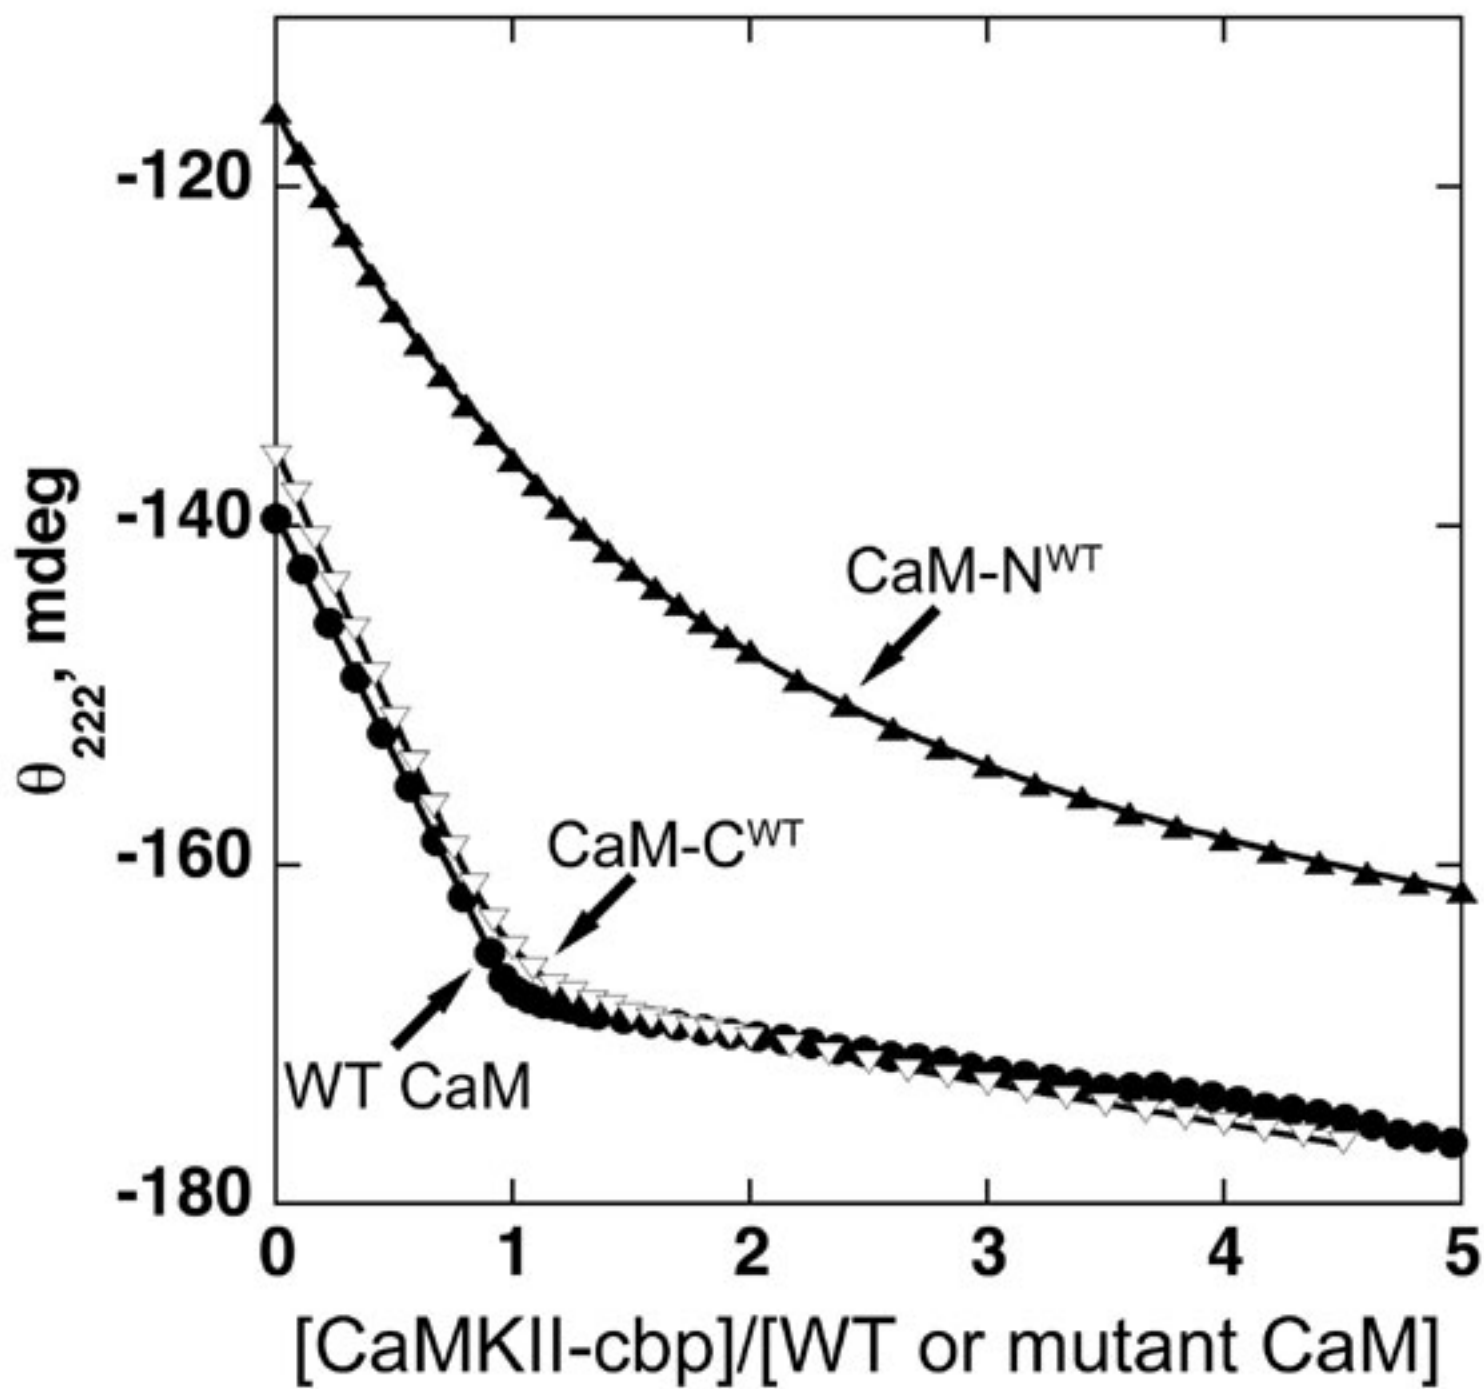

Supplement: pnas_0606433103_2.pdf [file pnas_0606433103_2.pdf]

**A**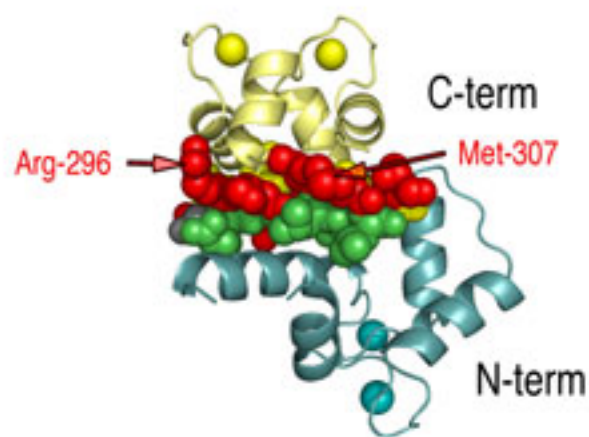**B**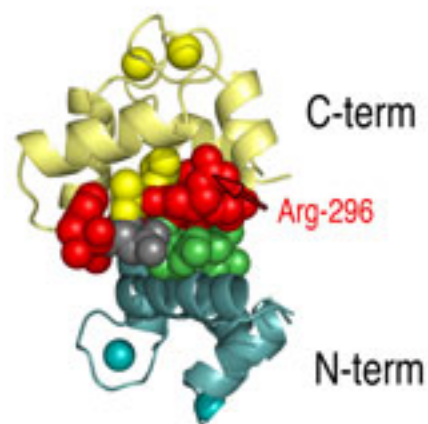**C**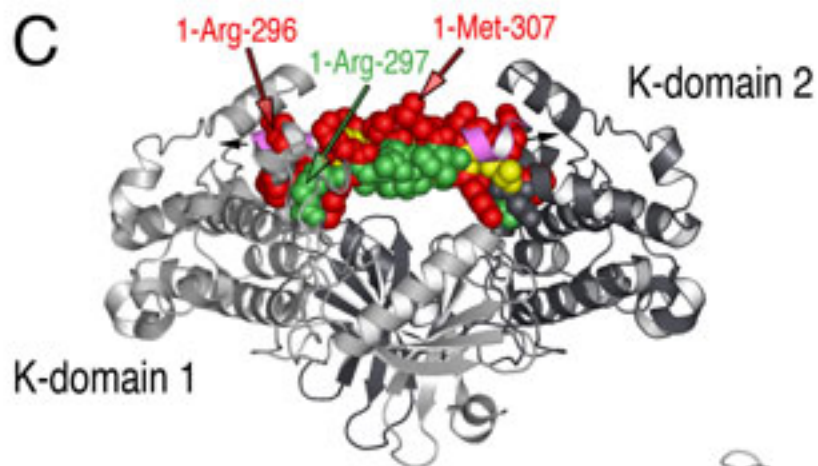**D**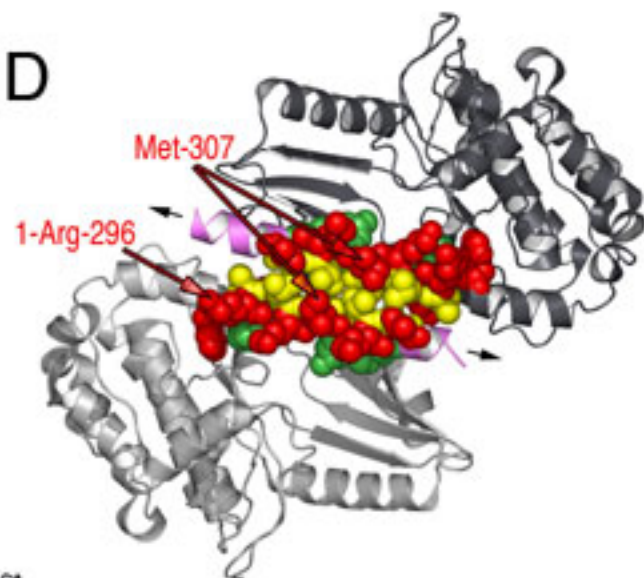**E**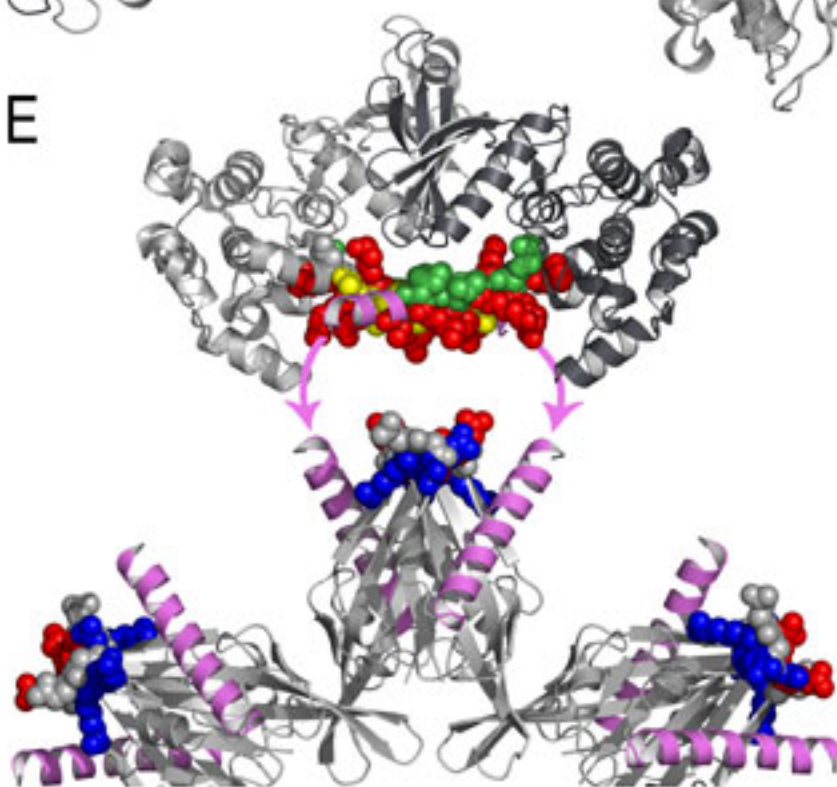

Supplement: pnas_0606433103_3.pdf [file pnas_0606433103_3.pdf]
